# Supplementary material for: In Vitro Analysis of the Effects of ITER-Like Tungsten Nanoparticles: Cytotoxicity and Epigenotoxicity in BEAS-2B Cells
Source: MDPI journal article supplement (doi:10.3390/nano9091233), 2019-08-30
Supplement: s1 [file s1]

# In Vitro Analysis of the Effects of ITER-Like Tungsten Nanoparticles: Cytotoxicity and Epigenotoxicity in BEAS-2B Cells

Chiara Uboldi <sup>1</sup>, Marcos Sanles Sobrido <sup>2</sup>, Elodie Bernard <sup>3,4</sup>, Virginie Tassistro <sup>1</sup>, Nathalie Herlin-Boime <sup>5</sup>, Dominique Vrel <sup>6</sup>, Sébastien Garcia-Argote <sup>7</sup>, Stéphane Roche <sup>8</sup>, Frédérique Magdinier <sup>8</sup>, Gheorghe Dinescu <sup>9</sup>, Véronique Malard <sup>4</sup>, Laurence Lebaron-Jacobs <sup>4</sup>, Jerome Rose <sup>2</sup>, Bernard Rousseau <sup>7</sup>, Philippe Delaporte <sup>3</sup>, Christian Grisolia <sup>10</sup> and Thierry Orsière <sup>1,\*</sup>

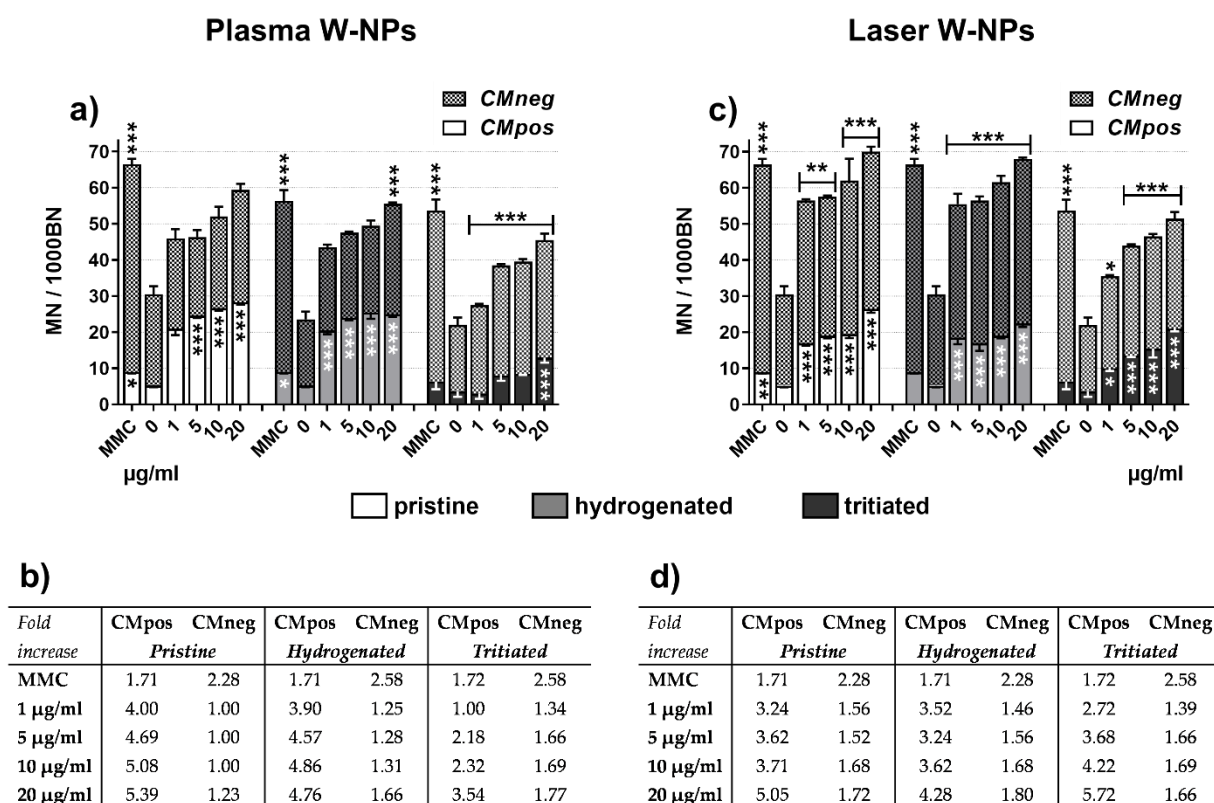

**Figure S1.** Pancentromeric staining in BEAS-2B cells exposed to W-NPs: (a) CMpos and CMneg formation upon exposure to plasma W-NPs; (b) CMpos and CMneg fold increase compared to untreated cells upon exposure to plasma W-NPs; (c) CMpos and CMneg formation upon exposure to laser W-NPs; (d) CMpos and CMneg fold increase compared to untreated cells upon exposure to laser W-NPs. Independently of the presence/absence of hydrogen and tritium, ITER-like plasma and laser W-NPs induced both CMpos and CMneg MN formation compared to the untreated cells (0 µg/ml). MMC (0.1 µg/mL) was used as positive control. Data are expressed as mean value ± SEM of two independent experiments, each in duplicate. Statistically significant differences from the untreated cells were determined by Chi-square test: \* $p < 0.05$ , \*\* $p < 0.01$  and \*\*\* $p < 0.001$ .
